# Supplementary material for: Promoting early neovascularization of SIS-repaired abdominal wall by controlled release of bioactive VEGF
Source: Royal Society of Chemistry journal article supplement (doi:10.1039/c7ra11954b), 2018-01-01
Supplement: c7ra11954b1.pdf [file c7ra11954b1.pdf]

## Promoting early neovascularization of SIS-repaired abdominal wall by controlled releasing bioactive VEGF

Rui Tang, Xin Wang, Hanying Zhang, Xi Liang, Xueyi Feng, Xiaoqiang Zhu, Xinwu Lu, Fei Wu, Zhengni Liu

Supplemental Figure 1

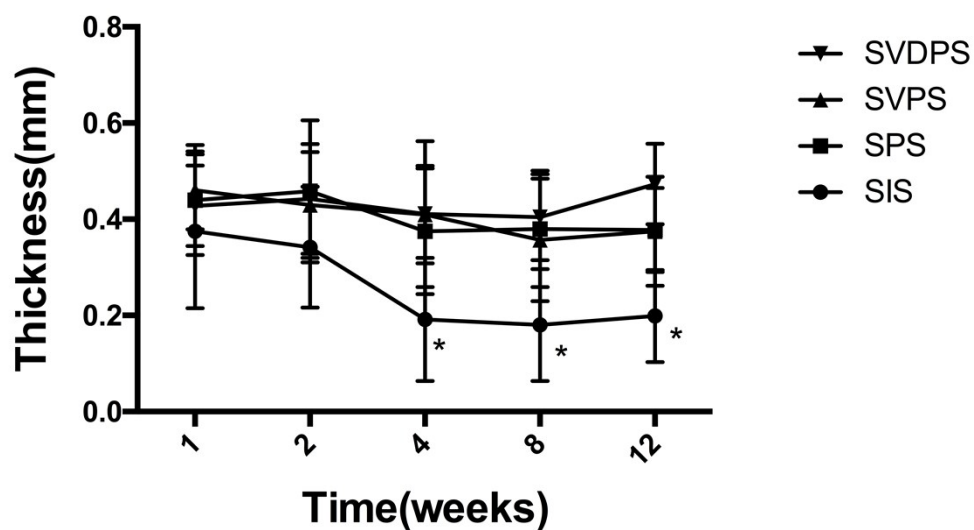

Supplemental Figure 1. The thickness of SVDPS, SVPS, SPS and SIS implants during the course of the experiment.

Supplemental Figure 2

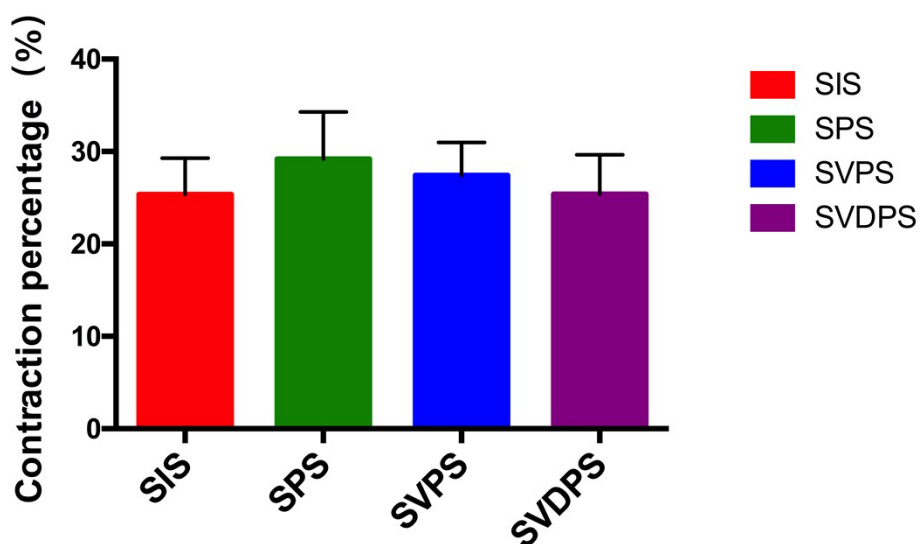

Supplemental Figure 2. The surface contraction of SVDPS, SVPS, SPS and SIS implants during the course of the experiment.

Supplemental Figure 3

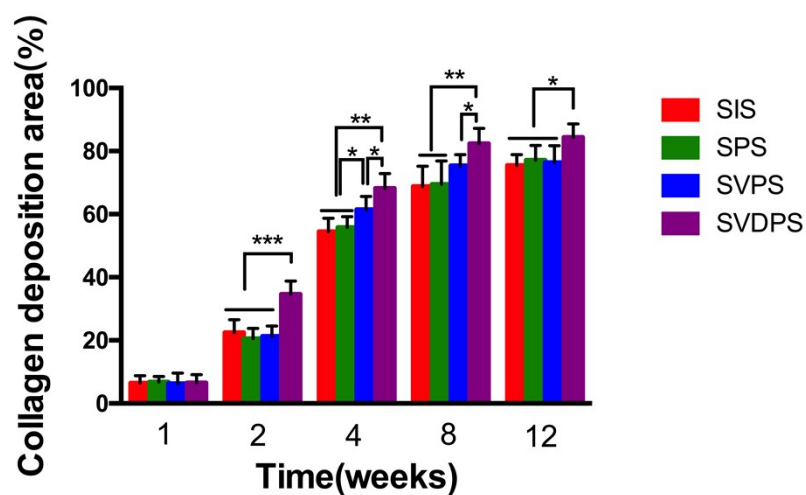

Supplemental Figure 3. The collagen deposition of SVDPS, SVPS, SPS and SIS implants during the course of the experiment. \* $p < 0.05$ , \*\* $p < 0.01$ , \*\*\* $p < 0.001$  compared with SVDPS group.

Supplemental Table 1. Mechanical properties of SIS, SPS, SVPS and SVDPS 1 week after implantation

| Group | n | Max load (N) | Young's modulus (MPa) | Tensile strength (MPa) | Stiffness (N/mm) |
|-------|---|--------------|-----------------------|------------------------|------------------|
| SIS   | 4 | 1.80 ± 0.29  | 3.39 ± 0.44           | 1.96 ± 0.89            | 1.49 ± 0.47      |
| SPS   | 4 | 1.94 ± 0.48  | 3.64 ± 0.79           | 2.01 ± 0.56            | 1.57 ± 0.38      |
| SVPS  | 4 | 2.09 ± 0.63  | 3.44 ± 1.29           | 1.93 ± 0.98            | 1.58 ± 0.27      |
| SVDPS | 4 | 2.33 ± 0.74  | 3.52 ± 0.74           | 2.17 ± 0.53            | 1.69 ± 0.36      |

Supplemental Table 2. Mechanical properties of SIS, SPS, SVPS and SVDPS 2 weeks after implantation

| Group | n | Max load (N)   | Young's modulus (MPa) | Tensile strength (MPa) | Stiffness (N/mm) |
|-------|---|----------------|-----------------------|------------------------|------------------|
| SIS   | 4 | 3.51 ± 0.80*** | 4.33 ± 0.72           | 2.17 ± 0.90            | 2.82 ± 0.75      |
| SPS   | 5 | 4.09 ± 0.35**  | 3.90 ± 1.26           | 2.08 ± 1.13            | 2.93 ± 0.56      |

|       |   |             |           |           |           |
|-------|---|-------------|-----------|-----------|-----------|
| SVPS  | 6 | 4.12±0.73** | 4.24±0.93 | 2.25±0.57 | 3.14±0.67 |
| SVDPS | 5 | 6.43±0.49   | 4.78±1.42 | 2.42±0.82 | 3.27±0.72 |

\*p<0.05, \*\*p<0.01, \*\*\*p<0.001, \*\*\*\*p<0.0001 compared with SVDPS group.

Supplemental Table 3. Mechanical properties of SIS, SPS, SVPS and SVDPS 4 weeks after implantation

| Group | n | Max load (N) | Young's modulus (MPa) | Tensile strength (MPa) | Stiffness (N/mm) |
|-------|---|--------------|-----------------------|------------------------|------------------|
| SIS   | 4 | 7.29±1.48    | 5.28±2.11**           | 2.87±0.78*             | 3.88±0.85        |
| SPS   | 6 | 8.10±1.35    | 6.82±0.92             | 3.02±0.62*             | 3.90±0.67        |
| SVPS  | 5 | 7.41±0.85    | 7.14±1.66             | 3.14±0.87              | 4.30±0.99        |
| SVDPS | 5 | 8.71±0.71    | 9.28±2.24             | 4.47±0.78              | 5.19±1.48        |

\*p<0.05, \*\*p<0.01 compared with SVDPS group.

Supplemental Table 4. Mechanical properties of SIS, SPS, SVPS and SVDPS 8 weeks after implantation

| Group | n | Max load (N) | Young's modulus (MPa) | Tensile strength (MPa) | Stiffness (N/mm) |
|-------|---|--------------|-----------------------|------------------------|------------------|
| SIS   | 4 | 11.98±1.15   | 5.71±1.56****         | 3.28±0.35*             | 4.38±1.18****    |
| SPS   | 5 | 11.82±0.08   | 8.23±1.91**           | 3.53±0.92              | 5.99±2.14*       |
| SVPS  | 4 | 11.98±1.31   | 9.44±1.38#            | 3.32±1.20*             | 6.43±1.64        |
| SVDPS | 5 | 12.29±1.56   | 12.13±2.20            | 4.87±1.22              | 8.25±1.67        |

\*p<0.05, \*\*p<0.01, \*\*\*\*p<0.0001 compared with SVDPS group.

#p<0.05 compared with SIS group.

Supplemental Table 5. Mechanical properties of SIS, SPS, SVPS and SVDPS 12 weeks after implantation

| Group | n | Max load (N) | Young's modulus (MPa) | Tensile strength (MPa) | Stiffness (N/mm) |
|-------|---|--------------|-----------------------|------------------------|------------------|
| SIS   | 4 | 12.49±1.53   | 6.37±1.88****         | 2.42±0.71**            | 4.76±1.12****    |
| SPS   | 4 | 11.85±1.27   | 9.03±2.16*            | 2.62±1.14              | 6.49±1.78*       |
| SVPS  | 6 | 12.84±1.35   | 10.44±2.33##          | 3.29±0.60*             | 6.88±1.25*,#     |
| SVDPS | 6 | 13.85±1.28   | 12.71±3.33            | 4.40±1.08              | 8.67±1.32        |

\*p<0.05, \*\*p<0.01, \*\*\*\*p<0.0001 compared with SVDPS group.

# p<0.05, ##p<0.01 compared with SIS group.
